# Supplementary material for: FGF401, A First-In-Class Highly Selective and Potent FGFR4 Inhibitor for the Treatment of FGF19-Driven Hepatocellular Cancer
Source: Oxford University Press journal article supplement (doi:10.1158/1535-7163.mct-18-1291), 2019-08-13
Supplement: 15357163mct181291-sup-212405_2_supp_5639286_psg05z.xlsx [file 15357163mct181291-sup-212405_2_supp_5639286_psg05z.xlsx]

## Sheet: Supp Table S2
Supplementary Table S2. Pharmacologic profiling of FGF401 in cancer cell lines. Anti-proliferative data for FGF401 was obtained for 436 cancer cell lines using an automated compound screening platform, and for 27 cell lines in manual cell proliferation assays. IC50, EC50 and Amax are reported. The site of the primary tumor from which the cell line was derived and RNAseq FKPM values for FGFR4, KLB…
Cell line	Primary site	RNASeq_ Expr.KLB	RNASeq_ Expr.FGF19	RNASeq_ Expr.FGFR4	CN_ FGF19	Highthroughput cell proliferation screen			FGF19 protein pg/mL_ cell lysate	FGF19 protein pg/mL_ supernatant	FGFR4 protein_ELISA	KLB protein_WB	Manual cell proliferation assay
						FGF401_ IC50 (uM)	FGF401_ EC50 (uM)	FGF401_Amax					FGF401_ IC50 (uM)	FGF401_ EC50 (uM)	FGF401_ Amax
697	haematopoietic_and_lymphoid_tissue	0.16	0.01	1.294	1.9758	>30	>30	3.87011
778	cervix	0.12	0.015	2.899	2.3094
921	eye	0.095	0.001	36.1	2.0206
5637	urinary_tract	0.12	0.073	0.294	2.747
2313287	stomach	0.128	0.014	125.558	2.0333
22rv1	prostate	1.181	0.01	9.687	2.0218
42mgba	central_nervous_system	0.103	0.011	1.109	1.5961
59m	ovary	0.057	0.011	16.607	2.3529	>30	>30	2.02694
639v	urinary_tract	0.2	0.009	3.191	2.4128	>30	>30	6.39726
647v	urinary_tract	0.2	0.014	1.482	2.4959
769p	kidney	0.43	0.014	346.548	2.0054	>30	>30	6.0924
786o	kidney	0.188	0.014	23.031	1.5665	>30	>30	2.10422
8305c	thyroid	0.054	0.025	0.605	2.0733
8505c	thyroid	0.132	0.014	1.065	2.5968	>30	>30	13.8532
8mgba	central_nervous_system	0.119	0.041	5.54	2.9232
a101d	skin	0.134	0.008	13.42	1.5901	>30	>30	-7.26697
a172	central_nervous_system	0.071	0.051	8.472	2.0808
a204	soft_tissue	0.086	0.146	30.104	1.9713	>30	>30	-1.58956
a2058	skin	0.139	0.017	19.965	1.9374	>30	>30	14.6984
a253	salivary_gland	0.085	2.083	16.989	13.2344
a2780	ovary	0.081	0.063	32.792	1.9685	>30	>30	5.08037
a375	skin	0.328	0.054	14.37	2.0536	>30	>30	4.15911
a3kaw	haematopoietic_and_lymphoid_tissue	0.141	0.009	1.142	1.9664
a427	lung	0.152	0.001	55.412	4.4688
a498	kidney	0.041	0.014	92.124	1.3114	>30	>30	-0.0873495
a4fuk	haematopoietic_and_lymphoid_tissue	0.118	0.001	5.741	1.9662
a549	lung	2.026	0.08	42.844	2.0228	>30	>30	-1.02552
a673	bone	0.092	0.216	13.966	2.8686	>30	>30	-9.95522
a704	kidney	0.119	0.012	71.481	2.0176	>30	>30	10
abc1	lung	0.136	0.024	8.723	2.2287
accmeso1	pleura	0.142	0.026	0.93	1.6967	>30	>30	3.21981
achn	kidney	0.084	0.027	35.038	1.9399	>30	>30	1.85695
ags	stomach	0.215	0.001	65.83	1.971
allsil	haematopoietic_and_lymphoid_tissue	0.149	0.001	0.407	1.9749
am38	central_nervous_system	0.118	0.031	0.129	2.4626	>30	>30	7.5107
aml193	haematopoietic_and_lymphoid_tissue	0.184	0.142	5.393	1.9453	>30	>30	-8.53252
amo1	haematopoietic_and_lymphoid_tissue	0.141	0.013	3.974	1.6897
an3ca	endometrium	0.162	0.178	17.47	1.9612	>30	>30	9.79466
aspc1	pancreas	0.126	99.079	33.403	2.7238	>30	>30	10.0759
au565	breast	0.086	0.001	30.174	2.471
bc3c	urinary_tract	50.45	0.171	3.49	1.8542	>30	>30	5.22091
bcp1	haematopoietic_and_lymphoid_tissue	0.223	0.023	1.15	1.9712
bcpap	thyroid	0.067	0.057	1.405	2.724
bdcm	haematopoietic_and_lymphoid_tissue	0.126	0.05	0.349	1.9841
ben	lung	4.36	0.222	39.385	2.1412
bftc905	urinary_tract	0.111	0.173	6.629	4.4934
bftc909	kidney	0.099	0.027	24.322	1.8725	>30	>30	1.90469
bht101	thyroid	0.11	0.034	8.67	2.8182
bhy	upper_aerodigestive_tract	0.093	0.044	1.14	10.7723	>30	>30	9.64687
bicr16	upper_aerodigestive_tract	0.043	9.052	19.224	2.9278	>30	>30	7.57475
bicr18	upper_aerodigestive_tract	0.063	3.137	15.749	16.7139	>30	>30	0.0190042
bicr22	upper_aerodigestive_tract	0.059	0.046	0.607	10.1455
bicr31	upper_aerodigestive_tract	0.071	7.684	4.103	8.8425
bicr56	upper_aerodigestive_tract	0.049	0.382	4.3	2.0375
bicr6	upper_aerodigestive_tract	0.148	0.329	2.937	15.7795	>30	>30	8.31174
bl41	haematopoietic_and_lymphoid_tissue	0.175	0.095	11.604	1.9339
bl70	haematopoietic_and_lymphoid_tissue	0.183	0.048	2.471	1.9735
bt16	central_nervous_system	0.178	0.001	16.97	2.0675	>30	>30	6.89538
bt20	breast	0.175	0.07	7.614	1.5243
bt474	breast	0.061	0.013	122.162	3.6861
bt483	breast	0.354	0.068	160.841	1.5837
bt549	breast	0.048	0.047	3.401	1.9063	>30	>30	10.1655
bv173	haematopoietic_and_lymphoid_tissue	0.164	0.026	1.573	2.0196
bxpc3	pancreas	0.026	2.598	0.749	2.1908	>30	>30	7.95086
c2bbe1	large_intestine	0.886	0.055	138.312	3.6407
c32	skin	0.078	0.049	3.312	2.0777	>30	>30	18.6343
c3a	liver				1.9615	>30	>30	17.5303	15	15	977355	0.942461	>10	>10	-7.6
ca46	haematopoietic_and_lymphoid_tissue	0.121	0.037	7.928	1.6868
cadoes1	bone	0.106	0.291	4.652	2.013
caki1	kidney	0.133	0.043	43.926	2.2251	>30	>30	6.82651
caki2	kidney	0.515	0.043	106.495	1.4113	>30	>30	-13.5668
cal120	breast	0.036	0.406	4.382	2.7276
cal12t	lung	0.125	0.071	8.469	2.6275	>30	>30	-14.5294
cal148	breast	0.083	0.061	117.808	2.0099	>30	>30	-3.39967
cal27	upper_aerodigestive_tract	0.252	0.08	6.78	3.0395	>30	>30	1.62702
cal29	urinary_tract	0.246	0.077	1.115	10.619	>30	>30	-13.256
cal33	upper_aerodigestive_tract	0.09	0.129	4.094	1.9085
cal51	breast	0.176	0.051	36.861	1.9612	>30	>30	8.89807
cal54	kidney	0.102	0.018	43.797	1.9497	>30	>30	3.60516
cal62	thyroid	0.102	0.079	2.436	2.618
cal78	bone	0.061	0.106	2.555	1.3876
cal851	breast	0.177	0.126	1.646	2.2924
calu1	lung	0.14	0.001	0.559	2.0206	>30	>30	13.4129
calu3	lung	0.161	0.582	250.914	2.0356
calu6	lung	0.104	0.055	1.994	2.0794	>30	>30	2.51874
cama1	breast	0.995	0.036	973.251	5.9164	>30	>30	15.3782
caov3	ovary	0.122	5.425	20.204	2.3671
caov4	ovary	0.114	0.146	8.644	1.8095
capan1	pancreas	0.081	6.559	34.176	2.1173	>30	>30	9.47697
capan2	pancreas	0.094	150.405	4.747	3.487
cas1	central_nervous_system	0.199	0.046	4.877	1.6649	>30	>30	15.0432
ccfsttg1	central_nervous_system	0.067	0.036	0.46	1.952
cck81	large_intestine	0.172	0.201	82.427	1.4953
ccrfcem	haematopoietic_and_lymphoid_tissue	0.171	0.001	0.088	2.0849	>30	>30	4.23646
ccrfhsb2	haematopoietic_and_lymphoid_tissue	0.052	0.001	2.787	1.9712	>30	>30	5.46944
cemc1	haematopoietic_and_lymphoid_tissue	0.129	0.001	0.224	2.0291	>30	>30	-5.09417
cfpac1	pancreas	0.258	7.936	16.208	2.1328	>30	>30	-12.7
chagok1	lung	0.116	0.137	7.781	1.8943	>30	>30	12.1892
chp126	autonomic_ganglia	0.144	0.203	7.387	2.0032
chp212	autonomic_ganglia	0.208	0.011	2.339	1.9869
ci1	haematopoietic_and_lymphoid_tissue	0.138	0.052	4.733	2.0015	28.3475	28.3475	-51.02
cjm	skin	0.082	0.039	0.892	3.0127
cl11	large_intestine	0.113	4.639	16.199	1.9909
cl14	large_intestine	0.519	0.573	47.243	2.491
cl34	large_intestine	0.403	0.083	87.589	1.9321
cl40	large_intestine	0.254	0.119	28.824	2.0139
cmk	haematopoietic_and_lymphoid_tissue	0.213	0.053	1.44	2.7193	>30	>30	4.81904
cmlt1	haematopoietic_and_lymphoid_tissue	0.214	0.092	1.656	1.9624
colo320	large_intestine	0.08	0.076	34.89	1.8317	>30	>30	3.41531
colo668	lung	0.182	0.034	1.779	1.2105
colo678	large_intestine	0.11	0.816	1.664	4.1417
colo679	skin	0.062	0.019	55.921	1.9912	>30	>30	3.96058
colo680n	oesophagus	0.114	3.797	13.66	4.852
colo684	endometrium	0.223	0.047	7.894	1.9901
colo741	skin	0.139	0.068	8.025	2.0545	>30	>30	13.2479
colo783	skin	0.048	0.039	3.828	2.0688
colo792	skin	0.057	0.022	7.223	2.0942
colo800	skin	0.109	0.038	1.367	1.3325
colo829	skin	0.028	0.044	7.511	1.8583
corl105	lung	0.074	0.009	10.593	2.2935
corl23	lung	0.12	0.069	18.688	2.8436	>30	>30	2.87683
corl24	lung	0.741	0.868	4.71	2.0256
corl279	lung	0.101	0.011	9.347	1.9886
corl311	lung	0.156	0.001	6.09	3.3562
corl47	lung	0.03	0.017	4.469	2.0185	>30	>30	-12.4475
corl88	lung	0.217	0.148	2.069	2.3261
corl95	lung	0.093	0.13	0.788	2.017
cov318	ovary	0.073	0.103	8.033	2.1187
cov362	ovary	0.083	0.036	3.478	4.8983
cov434	ovary	0.19	0.043	4.558	1.983
cov644	ovary	0.111	54.616	4.906	2.8164	>30	>30	18.2116
cw2	large_intestine	0.364	0.047	36.067	1.9631	>30	>30	1.54941
d283med	central_nervous_system	0.239	0.015	15.426	1.7299
d341med	central_nervous_system	23.564	0.04	8.12	1.9391
dang	pancreas	0.145	0.059	7.862	2.7631	>30	>30	0.600497
daoy	central_nervous_system	0.174	0.02	0.757	1.782	>30	>30	-1.29929
daudi	haematopoietic_and_lymphoid_tissue	0.118	0.057	10.914	1.9912
db	haematopoietic_and_lymphoid_tissue	0.12	0.001	5.671	2.7549	>30	>30	0.736025
dbtrg05mg	central_nervous_system	0.125	0.152	0.943	2.0613
del	haematopoietic_and_lymphoid_tissue	0.08	0.022	0.842	1.8776
detroit562	upper_aerodigestive_tract	0.15	0.283	3.91	6.0351	>30	>30	15.6044
dms114	lung	0.093	3.512	23.88	13.861
dms153	lung	0.212	0.037	3.187	1.9555
dms273	lung	0.141	0.024	8.627	1.5346	>30	>30	5.30145
dms454	lung	10.633	1.946	165.922	2.1715
dms53	lung	0.495	0.001	19.631	2.5901
dms79	lung	0.1	0.074	1.412	2.1023
dnd41	haematopoietic_and_lymphoid_tissue	0.044	0.075	1.576	1.9915	>30	>30	10.2225
dohh2	haematopoietic_and_lymphoid_tissue	0.159	0.038	18.235	1.9974
du145	prostate	1.126	0.091	17.711	2.0443
du4475	breast	0.331	170.091	1.668	1.967	>30	>30	1.14559
dv90	lung	0.326	0.056	61.216	2.0045
eb1	haematopoietic_and_lymphoid_tissue	0.159	0.045	2.439	2.1623
ebc1	lung	0.069	0.078	1.635	2.6763	>30	>30	9.74313
ecc10	stomach	0.136	4.898	22.611	2.2153
ecc12	stomach	3.338	0.075	175.477	2.6634
ecgi10	oesophagus	0.122	3.296	14.962	6.6329
efe184	endometrium	0.105	0.027	17.184	1.8467
efm19	breast	0.168	0.034	12.725	2.1055	>30	>30	0.916282
efm192a	breast	0.119	0.063	151.998	5.0128	>30	>30	8.85675
efo21	ovary	0.222	0.229	17.143	2.7781
efo27	ovary	0.191	0.085	17.521	2.0872
eheb	haematopoietic_and_lymphoid_tissue	0.188	0.093	1.461	2.0101
ejm	haematopoietic_and_lymphoid_tissue	0.073	0.013	2.362	2.5425
em2	haematopoietic_and_lymphoid_tissue	0.198	0.028	5.136	1.8822
en	endometrium	0.171	0.336	28.117	1.9801
eol1	haematopoietic_and_lymphoid_tissue	0.259	0.034	0.448	1.9881	>30	>30	-4.41937
eplc272h	lung	0.224	1.254	8.254	10.1129
es2	ovary	0.064	0.035	1.061	8.8177
ess1	endometrium	0.121	0.054	26.46	2.0258
f36p	haematopoietic_and_lymphoid_tissue	0.093	0.001	0.526	2.157
fadu	upper_aerodigestive_tract	0.097	2.349	8.262	19.4831	>30	>30	2.5838
ftc133	thyroid	0.055	0.021	0.46	1.5708
ftc238	thyroid	0.196	0.035	0.825	1.7959
fu97	stomach	99.166	10.741	343.875	2.0862	0.393358	0.0318719	-64.4823	841	413.598	1.16409e+06	6.38752	0.02322	0.0048	-56
fuov1	ovary	0.085	0.001	69.573	2.5849
g292clonea141b1	bone	0.146	0.039	1.347	3.9531
g361	skin	0.118	0.001	16.166	1.9141
g401	soft_tissue	0.342	0.097	12.663	1.9756	>30	>30	-6.83986
g402	soft_tissue	0.185	0.163	6.388	1.9914	>30	>30	2.93375
ga10	haematopoietic_and_lymphoid_tissue	0.172	0.04	2.412	1.9845
gamg	central_nervous_system	0.113	0.106	0.83	2.1335	>30	>30	-5.32591
gb1	central_nervous_system	0.065	0.075	0.372	1.9644	>30	>30	15.4784
gciy	stomach	0.191	0.073	65.211	2.0005
gct	soft_tissue	0.147	0.046	1.346	2.6154
gdm1	haematopoietic_and_lymphoid_tissue	0.191	0.023	1.799	1.9167	>30	>30	7.35367
gi1	central_nervous_system	0.119	0.073	1.668	2.3824	>30	>30	-2.35546
gms10	central_nervous_system	0.087	0.001	0.641	1.9763
gos3	central_nervous_system	0.1	0.115	2.674	2.0255
gp2d	large_intestine	0.13	0.034	144.363	2.0013	>30	>30	16.82
granta519	haematopoietic_and_lymphoid_tissue	0.076	0.045	1.989	2.1839	>30	>30	-0.274647
gss	stomach	0.075	802.168	46.209	3.1631
gsu	stomach	0.33	0.041	119.575	2.191
h4	central_nervous_system	0.074	0.286	21.152	1.9683	>30	>30	2.43339
hara	lung	0.254	0.327	16.868	4.0652	>30	>30	3.16375
hcc1143	breast	0.383	0.625	20.822	11.2074	>30	>30	7.83643
hcc1171	lung	0.307	0.079	7.096	1.7538
hcc1187	breast	0.45	0.091	8.692	3.5617	>30	>30	10.1518
hcc1195	lung	0.038	0.111	22.89	4.6449
hcc1395	breast	0.097	0.001	18.277	2.9476
hcc1419	breast	0.416	0.044	294.924	3.1594
hcc1428	breast	0.375	0.029	51.394	2.734
hcc15	lung	0.23	19.425	2.203	2.0882
hcc1500	breast	0.373	0.098	99.978	6.7878
hcc1569	breast	0.081	0.031	78.582	2.6602
hcc1588	large_intestine	0.105	0.502	59.421	1.9745	>30	>30	7.46181
hcc1599	breast	1.23	0.074	21.514	1.9945
hcc1806	breast	0.198	1.902	20.044	2.9321	>30	>30	0.799938
hcc1937	breast	0.083	0.396	15.546	2.9267
hcc1954	breast	0.249	0.396	70.413	9.9719	>30	>30	-5.82003
hcc202	breast	0.207	0.001	188.543	2.0824
hcc2157	breast	0.273	0.018	15.751	2.4586
hcc2218	breast	0.134	0.011	285.772	2.0121
hcc2279	lung	0.057	0.042	5.493	2.1312
hcc2935	lung	0.09	3.603	1.56	1.9621
hcc33	lung	0.165	0.001	1.08	2.6654
hcc366	lung	0.071	0.016	5.35	4.2204
hcc38	breast	0.733	0.037	12.616	2.7002
hcc4006	lung	0.346	11.683	6.636	3.1337	>30	>30	15.5603
hcc44	lung	0.122	0.014	2.087	1.7664	>30	>30	7.43486
hcc56	large_intestine	0.138	0.213	166.334	1.3869	>30	>30	-9.39893
hcc70	breast	0.161	0.506	3.391	1.8588	>30	>30	-1.18218
hcc78	lung	0.082	0.011	4.224	3.1911	>30	>30	-5.17984
hcc827	lung	0.132	0.028	27.035	2.4187	>30	>30	12.6813
hcc95	lung	0.031	0.067	17.592	2.3319	>30	>30	-0.45979
hct116	large_intestine	0.324	15.805	51.546	1.9654	>30	>30	8.79096
hct15	large_intestine	0.212	0.011	1.638	2.0074	>30	>30	16.4345
hdlm2	haematopoietic_and_lymphoid_tissue	0.051	0.001	7.087	1.9694
hdmyz	haematopoietic_and_lymphoid_tissue	0.05	0.024	4.989	1.782	>30	>30	-4.29617
hdqp1	breast	0.112	0.39	3.017	8.6
hec108	endometrium	0.169	0.008	65.685	2.0218	>30	>30	1
hec151	endometrium	0.168	0.026	61.456	1.9741	>30	>30	6.69362
hec1a	endometrium	0.149	0.009	72.619	2.0018
hec1b	endometrium	0.128	0.007	166.749	1.5403
hec251	endometrium	0.13	1.537	50.962	2.0082	>30	>30	14.1641
hec265	endometrium	0.244	0.009	23.385	1.9937	>30	>30	4.18696
hec50b	endometrium	0.14	0.017	134.95	2.9465	>30	>30	-0.495374
hec59	endometrium	0.236	0.001	93.077	2.0553
hec6	endometrium	0.12	0.001	45.709	2.0851
hel	haematopoietic_and_lymphoid_tissue	0.069	0.001	0.662	2.1241	>30	>30	-2.08231
hel9217	haematopoietic_and_lymphoid_tissue	0.304	0.001	1.85	2.1143	>30	>30	-8.30453
hep3b217	liver	26.689	24.136	372.678	3.2106	0.0639787	0.0104958	-60.8169	398.85	137.66	700932	4.12901	0.0071	0.001	-74.48
hepg2	liver	71.051	0.21	410.529	2.0151				15	15	964449	3.58513	>10	>10	-12.71
heya8	ovary	0.041	0.046	3.34	2.065	>30	>30	3.05751
hgc27	stomach	0.129	0.084	55.885	1.891
hh	haematopoietic_and_lymphoid_tissue	0.17	0.001	1.641	1.9931
hl60	haematopoietic_and_lymphoid_tissue	0.696	0.081	0.864	2.0126	>30	>30	-0.486822
hle	liver				3.0201	>30	>30	2.2856	15	15	80261.4	0.0765609	>10	>10	-4.9
hlf	liver	0.087	0.027	5.383	2.1733	>30	>30	0.126348	15	15	52039.4	0.0700035	>10	>10	-6.8
hmc18	breast	0.094	0.3	6.093	2.3307	>30	>30	2.04734
hmcb	skin	0.136	0.008	47.426	1.8686
hos	bone	0.207	0.089	16.681	5.7354
hpac	pancreas	0.475	7.652	7.85	2.0112	>30	>30	2.88291
hpafii	pancreas	0.114	3.878	37.445	2.2414
hpball	haematopoietic_and_lymphoid_tissue	0.075	0.008	1.774	2.1144	>30	>30	-2.02015
hs294t	skin	0.111	0.012	14.768	1.7224	>30	>30	-2.83313
hs611t	haematopoietic_and_lymphoid_tissue	0.151	0.001	0.753	1.9537
hs683	central_nervous_system	0.111	0.021	0.422	2.1145
hs695t	skin	0.057	0.008	5.087	1.74	>30	>30	6.21721
hs729	soft_tissue	0.11	0.018	0.709	2.0456
hs746t	stomach	0.106	0.008	0.432	8.4214
hs766t	pancreas	0.139	0.877	0.59	2.8518	>30	>30	15.0956
hs852t	skin	0.068	1.544	14.421	28.9226	>30	>30	-6.07639
hs936t	skin	0.082	0.037	2.706	1.3581
hs939t	skin	0.137	0.001	8.827	1.9598	>30	>30	7.96063
hs944t	skin	0.13	0.036	14.908	1.3429	>30	>30	10.6067
hsc2	upper_aerodigestive_tract	0.147	3.558	0.512	3.2556	>30	>30	10.5934
hsc3	upper_aerodigestive_tract	0.042	0.013	0.391	4.3235	>30	>30	4.43282
hsc4	upper_aerodigestive_tract	0.09	0.02	3.293	5.1165	>30	>30	7.09586
ht	haematopoietic_and_lymphoid_tissue	0.131	0.001	18.033	1.998
ht1080	soft_tissue	0.233	0.001	1.328	1.9791	>30	>30	-1.67727
ht115	large_intestine	0.267	2.658	75.19	1.9579
ht1197	urinary_tract	0.086	0.089	7.18	2.4421
ht1376	urinary_tract	0.16	0.001	0.565	2.1739
ht144	skin	0.089	0.001	18.777	1.6132
ht29	large_intestine	0.388	7.625	96.778	2.6498	>30	>30	0.99409
ht55	large_intestine	0.161	7.895	91.713	2.1481
hucct1	biliary_tract	0.093	1.192	1.229	3.1616
hug1n	stomach	0.073	0.057	47.89	2.0907	>30	>30	1.42595
huh1	liver	2.74	2.827	97.898	1.9505				94.39	187.928	224750	1.55058	>10	>10	-11.3
huh28	biliary_tract	0.052	0.015	3.59	1.6732
huh6	liver	9.441	0.216	182.358	1.9043	>30	0.508478	-18.2775	15	15	899890	0.887338	>10	>10	-28.9
huh7	liver	68.624	41.908	418.995	4.8054	0.0117468	0.00556758	-77.2075	1080.09	844.076	1.30593e+06	3.35613	0.01043	0.00894	-75.09
huns1	haematopoietic_and_lymphoid_tissue	0.147	0.001	0.364	1.9537
hupt3	pancreas	0.243	0.066	16.032	2.0238	>30	>30	-16.8672
hupt4	pancreas	0.135	0.081	1.481	2.6368	>30	>30	-31.5933
hut102	haematopoietic_and_lymphoid_tissue	0.072	0.001	0.664	1.9905
hut78	haematopoietic_and_lymphoid_tissue	0.22	0.009	0.768	2.4044
hutu80	small_intestine	0.052	0.001	15.408	1.994
ialm	lung	0.09	0.017	3.925	2.8484
igr1	skin	0.076	0.001	11.373	1.3134
igr37	skin	0.089	0.001	2.108	1.5105
igr39	skin	0.061	0.043	0.874	1.4731	>30	>30	10.8419
igrov1	ovary	2.24	0.012	63.199	1.9685	>30	>30	4.72472
im95	stomach	0.225	0.065	147.996	1.9549
imr32	autonomic_ganglia	0.162	0.06	12.069	1.9968
ipc298	skin	0.058	0.016	9.285	1.8359	>30	>30	2.84529
ishikawaheraklio02er	endometrium	0.4	0.401	15.297	1.9568
istmes1	pleura	0.095	0.177	2.107	1.8429
istmes2	pleura	0.175	0.013	4.207	1.9763	>30	>30	15.4468
j82	urinary_tract	0.048	0.01	0.206	2.5387	>30	>30	-0.568662
jeko1	haematopoietic_and_lymphoid_tissue	0.082	0.001	15.641	2.2518	>30	>30	-4.31434
jhh1	liver	1.032	0.084	90.224	2.4179				15	15	289829	0.0755528	>10	>10	-16.77
jhh2	liver	0.019	0.013	17.45	1.8006				15	15	28723.5	0.0873811	>10	>10	-12.46
jhh4	liver	0.107	0.001	140.83	2.2201	>30	>30	-1.8459	15	15	210664	0.0418749	>10	0.0784	2.88
jhh5	liver	2.078	2.727	222.366	3.3426				15	15	449720	1.38793	>10	>10	8.98
jhh6	liver	0.158	0.032	1.115	2.7532				15	15	853.45	0.0409251	>10	0.0098	-7.31
jhh7	liver	27.874	88.107	310.764	11.7174	>30	0.0158369	-49.0938	4410.2	13728.6	537741	1.1174	0.0032	0.00202	-67.44
jhoc5	ovary	0.078	0.018	20.08	2.2339
jhom1	ovary	0.21	0.035	1.577	8.611	>30	>30	-11.2269
jhom2b	ovary	0.153	0.053	17.801	1.9974
jhos2	ovary	0.093	0.009	3.112	2.3331	>30	>30	14.3065
jhos4	ovary	0.078	0.235	12.241	4.1662
jhuem1	endometrium	0.132	0.04	8.067	1.9334
jhuem2	endometrium	0.085	0.001	13.607	1.9704	>30	>30	7.19306
jhuem3	endometrium	0.09	0.086	34.497	5.1677
jhuem7	endometrium	0.116	0.015	57.578	1.964
jimt1	breast	0.039	0.156	32.772	2.0116	>30	>30	12.8887
jk1	haematopoietic_and_lymphoid_tissue	0.171	0.001	1.531	1.9439
jl1	pleura	0.041	0.078	8.82	2.0204	>30	>30	14.887
jm1	haematopoietic_and_lymphoid_tissue	0.174	0.039	1.62	1.674
jmsu1	urinary_tract	0.114	0.01	15.612	1.8708
ju77	pleura	0.055	0.026	0.597	3.0665	>30	>30	5.18852
jurkat	haematopoietic_and_lymphoid_tissue	0.087	0.001	3.798	2.0168
jurlmk1	haematopoietic_and_lymphoid_tissue	0.125	0.014	17.892	2.1425
jvm2	haematopoietic_and_lymphoid_tissue	0.062	0.001	0.884	1.9694	>30	>30	12.8366
jvm3	haematopoietic_and_lymphoid_tissue	0.091	0.001	0.79	1.9898
k029ax	skin	0.041	0.067	11.412	1.9252	>30	>30	-10.8746
k562	haematopoietic_and_lymphoid_tissue	0.124	0.029	21.358	2.0623
kals1	central_nervous_system	0.077	0.023	0.661	1.3752
karpas1106p	haematopoietic_and_lymphoid_tissue	0.157	0.001	3.718	1.9695
karpas299	haematopoietic_and_lymphoid_tissue	0.064	0.001	4.079	1.9665
karpas422	haematopoietic_and_lymphoid_tissue	0.127	0.001	1.939	1.9913	>30	>30	0.0677343
karpas620	haematopoietic_and_lymphoid_tissue	0.108	0.025	1.701	2.7217
kasumi1	haematopoietic_and_lymphoid_tissue	0.672	0.014	2.956	1.9687
kasumi2	haematopoietic_and_lymphoid_tissue	0.143	0.001	2.744	1.9971
kasumi6	haematopoietic_and_lymphoid_tissue	0.121	0.001	0.757	2.0016
katoiii	stomach	0.188	0.084	100.171	2.7976	>30	>30	15.6668
kcl22	haematopoietic_and_lymphoid_tissue	0.056	0.013	14.044	1.942
ke37	haematopoietic_and_lymphoid_tissue	0.123	0.001	2.596	1.9022
ke39	stomach	0.289	0.306	104.405	3.6185
ke97	haematopoietic_and_lymphoid_tissue	0.23	0.047	0.679	2.0017	>30	>30	1.37418
kelly	autonomic_ganglia	0.186	0.584	10.513	2.0023
kg1	haematopoietic_and_lymphoid_tissue	0.195	0.025	2.827	2.9317
kg1c	central_nervous_system	0.071	0.021	1.858	1.6864
khm1b	haematopoietic_and_lymphoid_tissue	0.186	0.001	0.502	3.8528
kijk	haematopoietic_and_lymphoid_tissue	0.145	0.001	0.724	1.601
kle	endometrium	0.028	1.003	23.569	1.6166	>30	>30	2.23048
km12	large_intestine	0.185	0.232	118.054	1.9757	>30	>30	15.8436
kmbc2	urinary_tract	0.284	0.001	1.04	2.3336
kmh2	haematopoietic_and_lymphoid_tissue	0.13	0.001	0.695	1.2087
kmm1	haematopoietic_and_lymphoid_tissue	0.115	0.024	9.22	2.3211	>30	>30	10.4238
kmrc1	kidney	0.086	0.017	10.207	2.1755	>30	>30	16.1344
kmrc2	kidney	0.087	0.02	55.436	1.7272
kmrc20	kidney	0.448	0.024	78.349	2.0363	>30	>30	-18.4345
kmrc3	kidney	0.068	0.063	28.796	1.9838
kms11	haematopoietic_and_lymphoid_tissue	0.107	0.001	11.46	1.978	>30	>30	15.4583
kms12bm	haematopoietic_and_lymphoid_tissue	0.167	0.025	5.698	2.6286
kms20	haematopoietic_and_lymphoid_tissue	0.155	0.056	13.085	1.0098
kms21bm	haematopoietic_and_lymphoid_tissue	0.177	0.015	3.308	2.1357
kms26	haematopoietic_and_lymphoid_tissue	0.12	0.012	0.799	1.4816
kms27	haematopoietic_and_lymphoid_tissue	0.146	0.017	1.258	2.9743
kms28bm	haematopoietic_and_lymphoid_tissue	0.067	0.036	1.534	2.8058
kms34	haematopoietic_and_lymphoid_tissue	0.15	0.066	3.244	1.9649
kns42	central_nervous_system	0.12	0.285	0.63	2.2173	>30	>30	3.46173
kns60	central_nervous_system	0.075	0.022	0.385	1.7394	>30	>30	-4.94872
kns62	lung	0.116	0.089	2.868	2.1014	>30	>30	5.90783
kns81	central_nervous_system	0.081	0.025	1.089	2.0137
ko52	haematopoietic_and_lymphoid_tissue	0.146	0.001	0.441	1.9879	>30	>30	-0.272511
kopn8	haematopoietic_and_lymphoid_tissue	0.079	0.001	6.199	2.0026
kp2	pancreas	0.1	0.213	1.42	2.196	>30	>30	9.78123
kp3	pancreas	0.044	1.703	44.481	2.7388	>30	>30	5.34469
kp4	pancreas	0.125	0.498	7.378	1.9773	>30	>30	13.4245
kpl1	breast	0.239	0.001	24.285	2.4031
kpnrtbm1	autonomic_ganglia	0.255	0.015	1.512	1.9634
kpnsi9s	autonomic_ganglia	0.052	0.303	9.271	1.9515
kpnyn	autonomic_ganglia	0.232	0.197	2.554	1.9645
ks1	central_nervous_system	0.092	0.015	41.095	1.5757	>30	>30	-16.2034
ku1919	urinary_tract	0.079	1.492	31.299	11.836	>30	>30	-1.06232
ku812	haematopoietic_and_lymphoid_tissue	0.2	0.001	3.311	3.9082
kuramochi	ovary	0.101	0.095	10.364	2.4995	>30	>30	-0.0627501
kym1	soft_tissue	0.132	0.043	9.733	2.0182
kyo1	haematopoietic_and_lymphoid_tissue	0.086	0.017	23.945	1.8374
kyse140	oesophagus	0.065	2.823	17.731	6.0288
kyse150	oesophagus	0.08	0.022	11.583	2.6081	>30	>30	-5.93839
kyse180	oesophagus	0.12	1.185	27.764	7.0097	>30	>30	7.41234
kyse270	oesophagus	0.129	0.13	50.423	1.9989
kyse30	oesophagus	0.116	0.037	3.31	2.472	>30	>30	5.7462
kyse410	oesophagus	0.155	0.088	2.626	10.5545	>30	>30	12.1012
kyse450	oesophagus	0.129	1.055	14.33	2.8176	>30	>30	-15.2005
kyse510	oesophagus	0.141	0.787	20.187	10.7561
kyse520	oesophagus	0.058	1.229	9.512	2.6832
kyse70	oesophagus	0.103	0.046	2.425	2.1575	>30	>30	2.39955
l1236	haematopoietic_and_lymphoid_tissue	0.067	0.011	6.26	1.3552
l33	pancreas	0.087	3.643	21.861	4.2927	>30	>30	5.79716
l363	haematopoietic_and_lymphoid_tissue	0.141	0.069	5.604	1.6791	>30	>30	11.3849
l428	haematopoietic_and_lymphoid_tissue	0.102	0.028	5.653	1.9679	>30	>30	13.4472
l540	haematopoietic_and_lymphoid_tissue	0.04	0.001	0.694	2.0475
lama84	haematopoietic_and_lymphoid_tissue	0.149	0.014	2.957	2.9525
lc1f	lung	0.058	0.315	46.195	1.9986	>30	>30	11.4893
lclc103h	lung	0.057	0.001	17.57	1.9434	>30	>30	7.62462
lclc97tm1	lung	0.157	0.232	6.647	2.0886
li7	liver	1.986	0.199	142.669	19.9342	>30	>30	-1.56166	15	15	49283.4	0.0218439	>10	>10	-22.42
lim1899	large_intestine	0.123	20.23	4.158	1.6323	>30	>30	11.5015
lim2099	large_intestine	0.112	0.115	6.392	1.8542
lim2405	large_intestine	0.177	0.019	13.269	2.0547	>30	>30	4.55871
lim2550	large_intestine	0.139	0.723	18.694	1.9968	>30	>30	10.3334
lim2551	large_intestine	0.135	3.327	100.782	2.0333
lk2	lung	0.312	415.455	32.532	2.2161	>30	>30	12.7696
lmsu	stomach	0.076	0.051	0.884	3.621	>30	>30	13.7236
ln18	central_nervous_system	0.119	0.113	7.115	2.1403	>30	>30	5.43867
ln229	central_nervous_system	0.05	0.047	8.172	2.4348	>30	>30	6.24373
lncapclonefgc	prostate	0.416	0.011	7.036	2.0136
lo68	pleura	0.036	0.001	8	2.0081	>30	>30	-1.18213
loucy	haematopoietic_and_lymphoid_tissue	0.208	0.013	0.761	1.9658
lounh91	lung	0.048	0.001	2.007	1.9799	>30	>30	4.34171
lovo	large_intestine	0.238	0.064	57.782	1.9925
loximvi	skin	0.053	0.011	2.296	2.4213	>30	>30	-8.65761
lp1	haematopoietic_and_lymphoid_tissue	0.091	0.067	1.335	2.0144	>30	>30	13.3648
lp6	soft_tissue	0.036	0.041	32.085	2.0698
ls1034	large_intestine	0.355	4.091	110.179	2.5515
ls123	large_intestine	0.162	0.112	3.181	3.1101
ls180	large_intestine	0.236	0.327	24.096	2.0049	>30	>30	0.332451
ls411n	large_intestine	0.143	0.25	143.252	2.2403
ls513	large_intestine	0.15	0.246	68.239	1.7844	>30	>30	19.939
lu65	lung	0.185	0.082	6.118	1.9552	>30	>30	4.45002
lu99	lung	0.121	0.011	38.404	1.305	>30	>30	4.62325
ludlu1	lung	0.111	0.063	8.086	2.292
lxf289	lung	0.073	0.331	9.159	2.4561
m059k	central_nervous_system	0.04	0.014	0.452	1.9823
m07e	haematopoietic_and_lymphoid_tissue	0.24	0.014	3.198	1.9907	>30	>30	-6.12188
malme3m	skin	0.095	0.001	7.85	1.0774
mc116	haematopoietic_and_lymphoid_tissue	0.157	0.016	5.732	1.8608
mcas	ovary	0.172	2.595	0.942	2.3646	>30	>30	13.1737
mcc142	skin	0.022	0.403	40.823	2.1974	>30	>30	2.8756
mcc26	skin	0.061	0.791	7.182	3.5263	>30	>30	-4.72568
mcf7	breast	0.516	0.02	17.625	2.5376
mdamb134vi	breast	0.394	0.322	890.139	16.4255	>30	>30	-4.14203
mdamb157	breast	0.069	0.042	28.159	1.7845	>30	>30	9.59789
mdamb175vii	breast	0.175	0.111	4.236	6.0058	>30	>30	15.8623
mdamb231	breast	0.107	0.013	3.185	2.5185	>30	>30	-1.95933
mdamb361	breast	0.27	0.22	246.521	4.6644
mdamb415	breast	0.284	0.072	179.799	24.3618	>30	>30	3.07053
mdamb435s	skin	0.109	0.001	0.587	2.2078	>30	>30	10.3879
mdamb436	breast	0.112	0.279	20.046	1.1473	>30	>30	4.57995
mdamb453	breast	0.488	0.072	1912.53	2.0613	0.00279776	0.00279776	-84.0737
mdamb468	breast	0.07	0.196	9.306	2.7354	>30	>30	-26.5674
mdapca2b	prostate	1.796	0.013	3.347	1.9963
mdst8	large_intestine	0.065	0.001	2.68	2.5727	>30	>30	5.03583
me1	haematopoietic_and_lymphoid_tissue	0.291	0.019	1.255	4.3447
mec1	haematopoietic_and_lymphoid_tissue	0.1	0.064	0.348	2.0039
meg01	haematopoietic_and_lymphoid_tissue	0.282	0.035	8.661	2.4594
mel202	eye	0.101	0.321	21.004	2.0004
mel270	eye	0.043	0.052	33.328	1.965
mel285	eye	0.08	0.001	5.313	2.1409
melho	skin	0.057	0.03	2.185	6.5696	>30	>30	4.65285
meljuso	skin	0.069	0.025	19.624	1.9426
messa	soft_tissue	0.136	0.016	14.493	1.9669	>30	>30	-0.925799
mewo	skin	0.279	0.01	40.124	4.7867	>30	>30	14.795
mfe280	endometrium	0.095	1.164	44.86	1.7996	>30	>30	4.61402
mfe296	endometrium	0.219	0.084	12.56	1.9277	>30	>30	9.30967
mfe319	endometrium	0.06	0.071	28.497	1.9528	>30	>30	-3.23889
mfm223	breast	0.027	0.001	143.152	16.7669	>30	>30	7.17364
mg63	bone	0.083	0.014	196.885	1.9487	>30	>30	-0.680492
mhhcall2	haematopoietic_and_lymphoid_tissue	0.111	0.061	28.093	1.9881
mhhcall3	haematopoietic_and_lymphoid_tissue	0.107	0.086	23.206	1.9886
mhhcall4	haematopoietic_and_lymphoid_tissue	0.082	0.056	1.732	1.9789
mhhes1	bone	0.137	0.772	43.24	3.0932
mhhnb11	autonomic_ganglia	0.148	0.247	26.164	1.8473
miapaca2	pancreas	0.129	0.098	13.863	1.4274	>30	>30	3.31077
mino	haematopoietic_and_lymphoid_tissue	0.162	0.058	0.372	1.9754	>30	12.5698	-36.7231
mj	haematopoietic_and_lymphoid_tissue	0.153	0.044	0.338	1.9943
mkn1	stomach	0.074	0.289	4.553	1.9437	>30	>30	2.59425
mkn45	stomach	0.05	0.733	87.823	3.1271	>30	>30	4.34383
mkn7	stomach	0.076	0.152	4.906	3.95
mkn74	stomach	0.084	0.257	2.172	3.0017
mm127	skin	0.117	0.001	0.271	2.4715	>30	>30	16.1674
mm138	skin	0.075	0.001	31.464	2.1128	>30	>30	9.03473
mm170	skin	0.017	0.001	34.148	1.6137	>30	>30	13.9326
mm1s	haematopoietic_and_lymphoid_tissue	0.166	0.001	3.418	2.0006
mm253	skin	0.033	0.001	45.22	1.9434	>30	>30	-0.768135
mm28	eye	0.24	0.075	20.747	1.5121
mm370	skin	0.057	0.021	15.266	2.158	>30	>30	5.24472
mm383	skin	0.067	0.021	16.641	1.8833	>30	>30	7.49174
mm386	skin	0.034	0.001	12.923	2.0081	>30	>30	18.2475
mm415	skin	0.066	0.001	44.198	2.0101
mm426	skin	0.022	0.018	45.075	2.0064	>30	>30	6.4694
mm466	skin	0.049	0.001	20.912	1.8164	>30	>30	0.403046
mm473	skin	0.136	0.001	4.498	2.2634	>30	>30	6.72219
mm485	skin	0.027	0.017	12.339	2.0009	>30	>30	6.11265
mm537	skin	0.015	0.001	2.252	1.8919
mm576	skin	0.074	0.022	13.713	4.9232	>30	>30	7.85197
mm603	skin	0.018	0.001	10.109	1.539	>30	>30	7.57458
mm66	eye	0.098	0.022	22.984	1.7348
molm13	haematopoietic_and_lymphoid_tissue	0.197	0.093	2.736	1.942	>30	>30	-3.94187
molm16	haematopoietic_and_lymphoid_tissue	0.094	0.077	0.532	2.5161
molm6	haematopoietic_and_lymphoid_tissue	0.148	0.109	2.464	1.9457
molp2	haematopoietic_and_lymphoid_tissue	0.064	0.089	2.752	2.4965
molp8	haematopoietic_and_lymphoid_tissue	0.076	0.228	0.776	1.9784	>30	15.1663	-42.9287
molt13	haematopoietic_and_lymphoid_tissue	0.282	0.124	2.028	1.9957	>30	>30	8.73105
molt16	haematopoietic_and_lymphoid_tissue	0.131	0.089	1.315	1.9661	>30	3.75093	-43.0569
molt3	haematopoietic_and_lymphoid_tissue	0.339	0.183	2.15	2.0273	>30	7.35827	-25.8531
monomac1	haematopoietic_and_lymphoid_tissue	0.2	0.027	1.243	1.9877	>30	3.0104	-28.4609
monomac6	haematopoietic_and_lymphoid_tissue	0.145	0.017	1.918	2.0218	>30	>30	-2.98351
morcpr	lung	0.111	45.231	26.564	1.8799	>30	>30	12.4753
mp41	eye	0.151	0.171	17.269	2.6213
mpp89	pleura	0.07	0.275	7.078	1.9875
msto211h	pleura	0.105	0.042	2.164	1.8005	>30	>30	-6.62559
mutz5	haematopoietic_and_lymphoid_tissue	0.073	0.038	1.997	2.0234
mv411	haematopoietic_and_lymphoid_tissue	0.24	0.031	3.55	1.99	>30	>30	18.8329
nalm1	haematopoietic_and_lymphoid_tissue	0.101	0.075	5.651	2.0517
nalm19	haematopoietic_and_lymphoid_tissue	0.107	0.066	4.533	2.0154
nalm6	haematopoietic_and_lymphoid_tissue	0.138	0.013	0.651	1.9844	>30	>30	-0.234522
namalwa	haematopoietic_and_lymphoid_tissue	0.076	0.08	8.931	1.976
nb1	autonomic_ganglia	0.113	0.04	2.011	1.7526	>30	>30	2.85026
nb4	haematopoietic_and_lymphoid_tissue	0.249	0.035	4.338	2.5805	>30	>30	-0.224325
nccstck140	stomach	0.439	0.103	3.143	1.9386
ncih1048	lung	0.109	0.086	9.437	2.0977	>30	>30	16.165
ncih1092	lung	0.138	0.007	0.761	2.7721
ncih1105	lung	0.076	1.145	2.778	2.4759
ncih1155	lung	0.211	0.154	3.124	1.8634	>30	>30	14.2399
ncih1184	lung	0.095	0.027	1.807	2.4286
ncih1299	lung	0.164	0.001	7.915	1.6636	>30	>30	-1.35222
ncih1339	lung	0.053	0.05	4.706	2.1068	>30	>30	14.3185
ncih1341	lung	0.143	0.041	3.92	1.7687	>30	>30	7.89383
ncih1355	lung	0.178	0.072	30.802	2.6007	>30	>30	0.94059
ncih1373	lung	0.416	0.185	14.044	2.155	>30	>30	4.0658
ncih1385	lung	0.115	1454.15	12.706	3.0581
ncih1395	lung	0.178	0.309	1.746	3.7646
ncih1435	lung	0.231	4.534	41.424	2.1149
ncih1436	lung	0.083	0.043	3.55	1.9591
ncih1437	lung	0.205	0.875	12.406	2.5573	>30	>30	-4.43999
ncih146	lung	0.097	2.686	2.104	1.9486	>30	>30	-20.4893
ncih1563	lung	0.043	0.108	1.31	1.9938
ncih1568	lung	0.138	0.457	4.311	2.6044	>30	>30	4.2526
ncih1573	lung	0.159	0.075	18.17	4.9845	>30	>30	6.14781
ncih1581	lung	0.208	0.082	9.674	2.0911	>30	>30	6.24775
ncih1618	lung	0.119	0.001	1.639	2.6212
ncih1623	lung	0.299	0.319	9.18	2.0593
ncih1648	lung	0.139	0.34	8.738	2.9283
ncih1650	lung	0.259	0.007	8.797	1.9624	>30	>30	-7.40092
ncih1651	lung	8.708	0.216	28.313	2.6478
ncih1666	lung	0.147	0.048	5.358	2.0245	>30	>30	-0.105311
ncih1693	lung	0.068	0.072	26.971	2.6959	>30	>30	-24.3505
ncih1694	lung	0.112	0.023	7.647	1.9101
ncih1703	lung	0.141	0.097	11.216	1.9494	>30	>30	9.28909
ncih1734	lung	0.251	0.135	13.372	2.6891
ncih1755	lung	0.158	2.923	7.63	1.9909	>30	>30	2.02785
ncih1781	lung	0.097	0.138	4.044	2.0768
ncih1792	lung	0.167	0.012	4.999	1.8932	>30	>30	0.595925
ncih1793	lung	0.125	0.107	1.388	1.9237
ncih1836	lung	0.199	0.001	1.097	2.1165
ncih1838	lung	0.129	0.325	10.652	2.4738
ncih1869	lung	0.368	0.091	2.645	2.6762
ncih1876	lung	0.263	0.001	2.516	1.8635
ncih1915	lung	0.137	0.056	11.093	3.0153
ncih1930	lung	0.137	0.049	15.433	1.9143
ncih1944	lung	1.869	0.049	48.568	1.9869
ncih196	lung	0.071	0.001	0.554	1.9234	>30	>30	-1.71246
ncih1963	lung	0.223	1.015	3.078	1.9023
ncih1975	lung	0.1	0.143	9.273	3.5989
ncih2009	lung	0.194	0.09	8.851	1.936
ncih2023	lung	5.503	0.046	13.265	1.4351	>30	>30	3.54811
ncih2029	lung	1.056	0.054	1.323	2.3122
ncih2030	lung	0.161	0.14	3.113	2.2698	>30	>30	-11.4664
ncih2052	pleura	0.095	0.026	2.937	3.2558	>30	>30	12.2198
ncih2066	lung	9.039	0.532	160.701	2.0701
ncih2073	lung	0.154	5.153	27.612	1.9165	>30	>30	-4.53189
ncih2081	lung	0.118	0.001	2.555	2.0351
ncih2085	lung	0.097	0.043	18.748	2.3054
ncih2087	lung	0.164	0.277	38.899	2.8414	>30	>30	5.13593
ncih209	lung	0.144	0.029	1.15	1.9523
ncih2106	lung	0.183	0.052	4.509	1.8167
ncih211	lung	0.091	0.007	24.933	4.3564	>30	>30	5.62283
ncih2110	lung	0.111	0.078	18.019	3.5096	>30	>30	12.6433
ncih2122	lung	0.176	0.505	8.265	1.8978	>30	>30	10.4731
ncih2126	lung	0.194	4.369	7.397	2.9567	>30	>30	18.6378
ncih2170	lung	0.265	0.001	4.445	2.0835	>30	>30	19.6237
ncih2171	lung	0.37	2.219	3.454	1.9545	>30	>30	12.4534
ncih2172	lung	0.073	0.184	2.626	2.4145	>30	>30	12.4147
ncih2196	lung	0.205	0.599	4.686	2.031
ncih2227	lung	0.167	0.202	8.463	2.6593
ncih2228	lung	0.072	1.155	0.663	2.4558	>30	>30	-4.85963
ncih226	lung	0.101	0.053	4.471	2.019
ncih2286	lung	0.144	0.022	23.508	2.0182	>30	>30	7.25356
ncih2291	lung	0.25	0.412	14.139	1.3361
ncih23	lung	0.107	0.233	25.057	5.715	>30	>30	6.70983
ncih2342	lung	0.701	0.065	2.549	2.6078
ncih2347	lung	0.332	0.065	11.384	2.3188
ncih2405	lung	0.074	0.574	79.174	2.002
ncih2444	lung	0.066	0.923	14.987	1.8243	>30	>30	2.53312
ncih2452	pleura	0.108	0.008	1.353	1.9546	>30	>30	8.92192
ncih28	pleura	0.162	0.084	153.419	1.5256	>30	>30	-2.49528
ncih292	lung	0.131	0.284	0.699	3.0938
ncih322	lung	0.13	0.161	4.005	2.9792	>30	>30	8.05101
ncih3255	lung	0.094	0.077	1.066	2.6032	>30	>30	-1.40996
ncih358	lung	0.163	0.29	4.726	2.4471
ncih441	lung	0.242	0.007	10.283	3.8494	>30	>30	4.58922
ncih446	lung	0.159	0.047	19.566	2.342
ncih460	lung	0.123	0.105	5.772	1.3588	>30	>30	-3.57729
ncih508	large_intestine	0.249	0.051	120.444	2.0959
ncih510	lung	0.238	0.174	10.024	1.9849
ncih520	lung	0.25	312.305	9.126	2.23
ncih522	lung	0.113	0.049	4.38	2.9869
ncih524	lung	0.134	0.128	8.755	1.8935
ncih526	lung	0.066	0.001	5.537	2.7887
ncih596	lung	0.068	1.16	1.848	2.1529
ncih647	lung	0.09	0.08	3.581	2.5535
ncih650	lung	0.129	0.01	23.445	3.0886	>30	>30	12.7686
ncih660	prostate	0.108	0.007	1.962	1.9598
ncih661	lung	0.135	0.082	20.688	1.96	>30	>30	-1.53503
ncih69	lung	0.073	0.549	1.718	2.0922
ncih716	large_intestine	20.05	0.001	7.788	1.6565	>30	>30	11.7848
ncih727	lung	1.673	0.183	73.916	3.0768
ncih747	large_intestine	0.221	0.064	9.032	2.6507	>30	>30	8.36344
ncih810	lung	0.371	0.009	114.358	2.0582	>30	>30	12.5397
ncih82	lung	0.161	0.001	16.93	1.4817	>30	>30	-8.68985
ncih838	lung	0.129	0.019	8.372	3.9369	>30	>30	-4.22543
ncih841	lung	0.114	0.073	29.431	2.4207	>30	>30	-0.964456
ncih854	lung	0.624	0.12	20.758	2.1698
ncih889	lung	0.378	0.02	1.542	2.0005
ncih929	haematopoietic_and_lymphoid_tissue	0.094	0.051	7.749	1.9756
ncin87	stomach	0.137	9.968	31.319	2.044	>30	>30	15.1691
nco2	haematopoietic_and_lymphoid_tissue	0.127	0.043	4.443	3.019
nh6	autonomic_ganglia	0.225	0.08	1.659	2.0266
nihovcar3	ovary	0.102	0.092	28.408	2.5555	>30	>30	-1.67008
nmcg1	central_nervous_system	0.159	0.055	0.485	1.9992
no36	pleura	0.027	0.648	17.548	2.1063	>30	>30	-0.152381
nomo1	haematopoietic_and_lymphoid_tissue	0.114	0.409	1.985	1.984	>30	>30	-1.3664
nudhl1	haematopoietic_and_lymphoid_tissue	0.115	0.044	6.664	1.8012
nudul1	haematopoietic_and_lymphoid_tissue	0.377	0.108	4.451	1.6477
nugc2	stomach	0.191	0.27	3.186	1.8676
nugc3	stomach	0.18	0.175	7.299	4.9784	>30	>30	-16.1205
nugc4	stomach	0.192	0.897	228.367	2.8725
oaw28	ovary	0.059	0.071	11.942	3.0853
oaw42	ovary	1.944	0.055	229.565	1.5441
oc314	ovary	0.125	0.094	22.202	1.9769
ociaml2	haematopoietic_and_lymphoid_tissue	0.139	0.023	0.52	1.9158	>30	>30	12.0271
ociaml3	haematopoietic_and_lymphoid_tissue	0.078	0.031	3.001	1.9123	>30	>30	2.20727
ociaml5	haematopoietic_and_lymphoid_tissue	0.118	0.033	5.477	1.9741	>30	>30	-6.09018
ocily19	haematopoietic_and_lymphoid_tissue	0.085	0.083	2.277	1.9615
ocily3	haematopoietic_and_lymphoid_tissue	0.207	0.027	0.774	2.7472	>30	18.4414	-17.4889
ocim1	haematopoietic_and_lymphoid_tissue	0.157	0.028	3.616	7.7959	>30	>30	-20.8779
ocum1	stomach	0.16	19.614	179.056	3.0154
oe19	oesophagus	0.176	8.725	69.669	4.3776
oe21	oesophagus	0.17	0.54	8.159	10.7601
oe33	oesophagus	0.132	0.046	23.183	2.5308
omm1	eye	0.056	0.027	49.961	1.2991
oncodg1	ovary	0.101	0.511	27.938	2.6345	>30	>30	0.135916
ons76	central_nervous_system	0.153	0.03	0.818	2.206
opm2	haematopoietic_and_lymphoid_tissue	0.053	0.023	1.96	2.5968
osrc2	kidney	0.317	0.07	33.966	1.8739
oums23	large_intestine	0.023	0.352	17.483	2.0163	>30	>30	-14.2279
ov56	ovary	0.075	0.094	7.803	1.7837	>30	>30	2.93715
ov7	ovary	0.026	0.001	0.744	2.009
ov90	ovary	0.325	0.571	48.167	2.182
ovcar4	ovary	0.062	0.15	17.338	2.1108	>30	>30	2.36394
ovcar8	ovary	0.153	0.283	76.531	2.6856
ovise	ovary	0.146	0.046	38.832	1.4038	>30	>30	16.3199
ovk18	ovary	0.094	0.064	6.954	1.8874
ovkate	ovary	0.08	0.001	4.501	3.0639
ovmana	ovary	6.296	0.02	35.873	2.1841
ovsaho	ovary	0.094	0.032	15.01	2.2105
ovtoko	ovary	0.881	0.13	40.776	2.0077
p12ichikawa	haematopoietic_and_lymphoid_tissue	0.149	0.078	2.498	1.9924	>30	>30	7.39369
p31fuj	haematopoietic_and_lymphoid_tissue	0.277	0.052	1.233	1.9703	>30	>30	1.11724
p3hr1	haematopoietic_and_lymphoid_tissue	0.243	0.104	7.388	1.988	>30	>30	0.904986
panc0203	pancreas	0.071	0.815	7.675	2.1721	>30	>30	-7.09538
panc0213	pancreas	0.132	0.549	2.596	2.0769	>30	>30	7.92123
panc0327	pancreas	0.095	25.35	7.311	2.619	>30	>30	7.65642
panc0403	pancreas	0.154	2.593	3.298	2.0436	>30	>30	1.51489
panc0504	pancreas	0.078	3.382	2.508	2.1782
panc0813	pancreas	0.102	0.041	1.238	3.8755
panc1	pancreas	0.099	0.085	3.993	2.6571	>30	>30	-2.15452
panc1005	pancreas	0.138	0.616	9.322	2.0262	>30	>30	-9.72283
patu8902	pancreas	0.102	0.059	4.621	3.1558	>30	>30	16.8978
patu8988s	pancreas	0.09	0.139	274.497	2.4502	>30	0.254057	-30.5489
patu8988t	pancreas	0.159	0.067	25.617	2.7459	>30	>30	0.767712
pc14	lung	0.1	1.116	6.981	2.661	>30	>30	-3.36468
pc3	prostate	0.123	0.084	21.357	2.5404	>30	>30	3.99052
pecapj15	upper_aerodigestive_tract	0.056	0.716	9.503	7.8479
pecapj34clonec12	upper_aerodigestive_tract	0.034	0.294	11.143	7.7821	>30	>30	8.61003
pecapj41cloned2	upper_aerodigestive_tract	0.118	0.38	2.849	4.2846
pecapj49	upper_aerodigestive_tract	0.135	0.231	25.676	2.0138	>30	>30	-0.336521
peer	haematopoietic_and_lymphoid_tissue	0.17	0.027	0.259	1.9931
pf382	haematopoietic_and_lymphoid_tissue	0.125	0.018	2.977	2.1613	>30	>30	-3.4405
pfeiffer	haematopoietic_and_lymphoid_tissue	0.203	0.001	4.989	2.0234
pk1	pancreas	0.094	0.289	7.221	1.7658	>30	>30	-2.73257
pk45h	pancreas	0.054	0.047	0.305	2.0407	>30	>30	6.66877
pk59	pancreas	0.264	0.508	1.736	1.9404	>30	>30	0.103063
pl21	haematopoietic_and_lymphoid_tissue	0.162	0.051	0.634	1.5337	>30	>30	-4.52012
plcprf5	liver	29.22	0.056	174.338	2.1753	>30	>30	-2.42791	15	15	683067	4.41092	>10	>10	-1.85
psn1	pancreas	0.148	0.04	4.048	1.9977	>30	>30	5.95659
qgp1	pancreas	0.14	3.501	4.479	2.4815
raji	haematopoietic_and_lymphoid_tissue	0.373	0.018	21.702	1.9366
rcc10rgb	kidney	0.162	0.013	35.99	2.662
rchacv	haematopoietic_and_lymphoid_tissue	0.075	0.052	7.437	1.9769
rcm1	large_intestine	0.168	7.007	86.113	1.9655	>30	>30	0.0820949
rd	soft_tissue	0.133	0.026	144.815	1.9496	>30	>30	6.58984
rdes	bone	0.154	0.753	21.013	3.4451	>30	>30	9.47082
rec1	haematopoietic_and_lymphoid_tissue	0.067	0.094	2.937	2.7414
reh	haematopoietic_and_lymphoid_tissue	0.187	0.012	10.649	1.971
rerfgc1b	stomach	0.148	0.072	16.865	2.6766
rerflcad1	lung	0.13	4.81	0.955	2.3854
rerflcad2	lung	0.247	0.067	5.018	4.2094
rerflcai	lung	0.147	0.133	4.423	2.7525	>30	>30	-0.322964
rerflckj	lung	0.065	0.008	6.845	2.0195
rerflcms	lung	0.079	0.238	19.043	1.8647	>30	>30	1.23564
rerflcsq1	lung	0.042	0.156	4.6	2.0823
rh30	soft_tissue	0.114	0.03	707.421	4.2374
rh41	soft_tissue	0.13	0.033	760.719	1.2562	>30	3.62011	-39.1743
ri1	haematopoietic_and_lymphoid_tissue	0.09	0.01	4.387	1.998
rkn	soft_tissue	0.081	0.009	1.339	2.2689	>30	>30	-0.692514
rko	large_intestine	0.643	0.034	7.77	1.9526	>30	>30	18.3863
rl	haematopoietic_and_lymphoid_tissue	0.234	0.063	3.052	2.847
rl952	endometrium	0.058	0.017	8.869	1.9856
rmgi	ovary	0.077	0.047	26.974	1.9565
rmugs	ovary	0.248	0.036	2.447	2.0005
rpmi7951	skin	0.109	0.041	11.121	2.1583	>30	>30	4.7402
rpmi8226	haematopoietic_and_lymphoid_tissue	0.136	0.078	11.678	2.5942
rpmi8402	haematopoietic_and_lymphoid_tissue	0.169	0.009	1.705	1.6259	>30	>30	0.537144
rs411	haematopoietic_and_lymphoid_tissue	0.096	0.037	6.302	1.9566
rt112	urinary_tract	0.218	0.029	1.564	1.9843	>30	>30	2.94445
rt4	urinary_tract	0.293	0.017	0.76	2.0145
rvh421	skin	0.046	0.012	3.131	2.6261	>30	>30	16.6123
s117	soft_tissue	0.267	0.023	1.969	1.0808
sbc5	lung	0.059	0.083	21.702	1.3752
scaber	urinary_tract	0.169	0.451	4.983	4.0148	>30	>30	6.0873
scc15	upper_aerodigestive_tract	0.042	0.619	2.534	12.6287
scc25	upper_aerodigestive_tract	0.069	7.24	5.639	7.9219	>30	>30	-4.20199
scc4	upper_aerodigestive_tract	0.136	0.263	5.733	9.2504
scc9	upper_aerodigestive_tract	0.295	0.156	1.927	2.5291
sclc21h	lung	0.163	1.602	11.312	1.738
sem	haematopoietic_and_lymphoid_tissue	0.187	0.001	0.613	1.8327	>30	>30	1.9604
set2	haematopoietic_and_lymphoid_tissue	0.131	0.021	2.482	2.0123
sf126	central_nervous_system	0.091	0.078	5.439	1.9628
sf268	central_nervous_system	0.083	0.047	1.088	1.9892	>30	>30	-11.2603
sf295	central_nervous_system	0.106	0.019	0.863	6.4379
sh10tc	stomach	0.1	0.058	5.156	1.6151	>30	>30	-11.5086
sh4	skin	0.041	0.063	12.896	1.9983	>30	>30	-12.2158
shp77	lung	0.081	3.409	2.544	2.9406	>30	>30	2.1671
sigm5	haematopoietic_and_lymphoid_tissue	0.194	0.054	5.614	1.9103
sima	autonomic_ganglia	0.092	4.904	5.201	1.4618
sjsa1	bone	0.128	14.93	2.627	5.4087
skbr3	breast	0.063	0.02	28.318	2.0997
skco1	large_intestine	0.111	0.109	59.095	2.9359	>30	>30	17.659
skes1	bone	0.164	0.206	10.14	1.9385	>30	>30	-0.956489
skhep1	liver	0.072	0.024	34.925	2.014	>30	>30	6.51519	15	15	41772.4	0.0594901	>10	>10	-25.14
sklms1	soft_tissue	0.125	0.001	0.281	2.7139
sklu1	lung	0.124	0.088	3.876	2.5654	>30	>30	12.5269
skm1	haematopoietic_and_lymphoid_tissue	0.107	0.016	8.626	1.7713	>30	>30	-5.50514
skmel1	skin	0.131	0.052	0.822	2.0788
skmel24	skin	0.052	0.025	1.586	1.9643
skmel28	skin	0.083	0.094	11.894	2.9618	>30	>30	0.693482
skmel3	skin	0.105	0.052	9.961	2.0173	>30	>30	15.8367
skmel30	skin	0.13	0.01	10.011	4.4941	>30	>30	11.1143
skmel31	skin	0.075	0.001	2.646	1.8448	>30	>30	-5.57605
skmel5	skin	0.201	0.022	12.298	6.6707	>30	>30	-1.25935
skmes1	lung	0.087	0.001	5.086	2.2373	>30	>30	13.3178
skmm2	haematopoietic_and_lymphoid_tissue	0.102	0.011	1.657	3.0534
sknas	autonomic_ganglia	0.212	0.15	8.698	1.9869
sknbe2	autonomic_ganglia	0.149	0.072	3.658	2.06	>30	>30	-0.258834
skndz	autonomic_ganglia	0.327	0.027	1.093	2.1997
sknfi	autonomic_ganglia	0.082	1.056	0.383	1.9771
sknmc	bone	0.142	4.573	26.158	2.0073
sknsh	autonomic_ganglia	0.205	0.019	6.866	2.0249
skov3	ovary	0.075	0.115	34.123	1.9956
skut1	soft_tissue	0.181	0.175	46.943	2.0126
sngm	endometrium	0.081	0.012	40.563	1.9856	>30	>30	-12.9426
snu1	stomach	0.102	0.029	1.753	1.989
snu1040	large_intestine	0.264	12.223	26.498	1.9138	>30	>30	-0.0448536
snu1076	upper_aerodigestive_tract	0.102	0.04	1.38	2.3565
snu1077	endometrium	0.102	0.149	23.155	3.3383
snu1079	biliary_tract	0.113	6.769	91.089	6.9488	>30	>30	-1.69232
snu1105	central_nervous_system	0.072	0.001	1.308	1.6457
snu119	ovary	0.036	0.037	47.526	2.8602
snu1196	biliary_tract	0.232	8.964	20.478	4.5773
snu1197	large_intestine	0.36	10.154	1.446	2.106
snu1214	upper_aerodigestive_tract	0.063	0.089	2.841	2.0289
snu1272	kidney	0.107	0.046	35.523	2.1596
snu16	stomach	0.191	0.029	15.367	2.0925	>30	>30	7.91042
snu175	large_intestine	0.385	0.183	58.323	1.9131	>30	>30	-3.53161
snu182	liver	0.102	0.066	6.279	2.0836				15	15	980.429	0.019303	>10	>10	-13.85
snu201	central_nervous_system	0.114	0.035	1.46	1.8072
snu213	pancreas	0.105	0.097	3.315	2.8058	>30	>30	8.93406
snu216	stomach	0.094	0.025	7.04	3.0479
snu245	biliary_tract	0.125	1.467	140.334	1.9246
snu283	large_intestine	0.103	0.023	132.735	2.0859
snu308	biliary_tract	0.168	0.472	6.364	2.0078
snu324	pancreas	0.118	0.008	5.484	2.1519	>30	>30	-18.9366
snu349	kidney	0.044	0.108	25.82	1.8418	>30	>30	7.43016
snu387	liver	0.134	0.027	0.371	11.8016	>30	>30	1.60217	15	15	100	0.0113947	>10	>10	-8.57
snu398	liver	0.323	0.048	48.323	2.0574	>30	>30	-5.34543	15	15	28930.4	0.0173327	>10	>10	-22.9
snu407	large_intestine	0.148	21.111	16.537	1.9718
snu410	pancreas	0.057	0.534	5.107	1.4894
snu423	liver	0.119	0.001	1.868	2.4824	>30	>30	-0.542699	15	15	100	0.0213021	>10	>10	-20.52
snu449	liver	0.874	0.027	143.994	1.9524	>30	>30	3.11514	15	15	38955.4	0.0221051	>10	>10	-13.32
snu46	upper_aerodigestive_tract	0.188	0.28	7.454	2.6253
snu466	central_nervous_system	0.04	0.014	1.536	1.4312
snu475	liver	0.123	1.091	7.99	8.9764	>30	>30	6.62017	15	15	9047.43	0.0226209	>10	>10	-18.05
snu478	biliary_tract	0.084	0.024	14.105	3.0448
snu489	central_nervous_system	0.047	0.02	0.809	1.8423
snu5	stomach	0.074	4.615	46.406	2.557
snu503	large_intestine	0.12	2.34	12.578	1.7408
snu520	stomach	0.086	0.009	150.274	1.7912
snu601	stomach	0.113	0.264	91.215	2.3615
snu61	large_intestine	0.201	0.188	67.895	3.5445	>30	>30	10.788
snu620	stomach	0.1	0.016	60.778	1.8229
snu626	central_nervous_system	0.067	0.16	0.606	1.8077
snu668	stomach	0.073	0.042	12.738	5.1623	>30	>30	5.06433
snu685	endometrium	0.172	0.049	13.956	2.8061	>30	>30	-0.435471
snu719	stomach	0.115	0.012	62.63	1.7477
snu738	central_nervous_system	0.048	0.001	14.816	1.866	>30	>30	-0.468596
snu761	liver	4.545	4.943	126.746	22.5042	>30	>30	-0.147082	30.0629	52.2708	188572	0.36256	>10	>10	-22.27
snu8	ovary	0.109	3.55	5.038	1.7355	>30	>30	-1.28346
snu81	large_intestine	0.399	1.587	19.421	1.929	>30	>30	-11.2875
snu840	ovary	0.095	0.01	4.662	2.1074
snu878	liver	5.577	24.591	130.735	26.51	0.236487	0.057585	-65.7412	273.45	593.478	376092	0.438247	>10	0.02183	-34.99
snu886	liver	1.911	0.328	49.737	35.3686	>30	>30	-18.9426	15	464.235	136945	0.1028	>10	>10	-14.8
snu899	upper_aerodigestive_tract	0.16	0.026	0.653	2.8693
snuc1	large_intestine	0.3	0.134	62.58	1.9906
snuc2a	large_intestine	0.535	0.762	5.306	2.0251	>30	>30	-3.6578
snuc4	large_intestine	0.185	0.021	100.609	2.0011	>30	>30	9.29466
snuc5	large_intestine	0.155	10.44	21.993	1.9132	>30	>30	4.5982
sq1	lung	0.226	0.006	31.21	2.7297	>30	>30	-10.5456
sr786	haematopoietic_and_lymphoid_tissue	0.074	0.055	1.155	2.3747	>30	>30	3.16465
st486	haematopoietic_and_lymphoid_tissue	0.287	0.078	1.598	1.6934
su8686	pancreas	0.13	17.047	5.646	2.6287	>30	>30	4.22046
sudhl1	haematopoietic_and_lymphoid_tissue	0.15	0.023	3.26	1.715
sudhl10	haematopoietic_and_lymphoid_tissue	0.012	0.043	2.776	2.0048	>30	>30	5.61407
sudhl4	haematopoietic_and_lymphoid_tissue	0.056	0.001	10.184	1.874	>30	>30	0.0186746
sudhl5	haematopoietic_and_lymphoid_tissue	0.224	0.025	3.866	1.9618	>30	10.0535	-40.8593
sudhl6	haematopoietic_and_lymphoid_tissue	0.137	0.067	7.979	2.0085	>30	1.28998	-20.3511
sudhl8	haematopoietic_and_lymphoid_tissue	0.122	0.022	0.904	1.7379	>30	>30	-2.38388
suit2	pancreas	0.353	0.151	71.634	3.0704	>30	>30	-4.8448
sum102pt	breast	0.047	0.001	1.734	2.0074
sum149pt	breast	0.056	0.016	21.167	3.0607	>30	>30	-3.39722
sum159pt	breast	0.046	0.001	7.97	1.9498	>30	>30	-1.12665
sum185pe	breast	0.046	0.001	26.896	1.6122
sum190pt	breast	0.184	0.054	84.489	7.5998
sum225cwn	breast	0.337	0.042	64.557	2.6225
sum229pe	breast	0.048	4.231	17.768	1.4978
supb15	haematopoietic_and_lymphoid_tissue	0.242	0.01	0.394	2.0239
supm2	haematopoietic_and_lymphoid_tissue	0.116	0.066	2.591	1.96
supt1	haematopoietic_and_lymphoid_tissue	0.156	0.024	0.495	1.923	>30	>30	15.8086
supt11	haematopoietic_and_lymphoid_tissue	0.156	0.008	6.308	2.2618
sw1088	central_nervous_system	0.103	0.248	4.125	1.8793	>30	>30	-3.65238
sw1116	large_intestine	0.14	4.862	63.354	2.0155
sw1271	lung	0.065	0.027	3.154	2.4756	>30	>30	-6.47602
sw1353	bone	0.157	0.04	1.741	1.9869	>30	>30	4.20214
sw1417	large_intestine	0.166	4.072	101.048	2.4586	>30	>30	-3.18204
sw1463	large_intestine	0.104	5.693	113.465	2.5543
sw1573	lung	0.096	0.038	14.366	1.7719	>30	>30	6.32749
sw1710	urinary_tract	0.145	0.014	43.279	2.384
sw1783	central_nervous_system	0.061	0.001	0.924	1.6778	>30	>30	-20.1047
sw1990	pancreas	0.152	0.041	2.744	2.8536
sw403	large_intestine	0.128	1.943	187.597	1.9979	>30	>30	13.2504
sw48	large_intestine	0.14	0.023	25.217	1.953	>30	>30	-5.4212
sw480	large_intestine	0.078	173.246	14.528	2.5233	>30	>30	7.05631
sw579	thyroid	0.106	0.01	0.253	2.0563
sw620	large_intestine	0.204	74.687	158.603	2.7574	>30	>30	3.61236
sw780	urinary_tract	0.167	0.049	1.374	2.0701
sw837	large_intestine	0.213	92.303	62.304	2.2172
sw900	lung	0.275	0.278	6.741	2.5592	>30	>30	-3.52686
sw948	large_intestine	0.14	1.386	123.191	2.0912
t24	urinary_tract	0.077	0.01	1.134	2.6833
t3m4	pancreas	0.325	16.396	2.564	2.6066	>30	>30	3.20643
t47d	breast	0.065	0.048	23.321	2.7504	>30	>30	-12.0151
t84	large_intestine	0.12	0.013	156.212	2.1008
t98g	central_nervous_system	0.126	0.012	1.15	2.0059
tall1	haematopoietic_and_lymphoid_tissue	0.1	0.016	1.235	2.0483	>30	3.62726	-21.6213
tanoue	haematopoietic_and_lymphoid_tissue	0.103	0.001	4.53	2.0149	>30	>30	0.701854
tc71	bone	0.192	0.009	26.799	2.0674	>30	>30	4.77968
tccpan2	pancreas	0.046	0.326	53.481	2.1785	>30	>30	-1.60168
tccsup	urinary_tract	0.077	0.046	0.204	1.9883
te1	oesophagus	0.085	0.14	16.514	2.7257	>30	>30	0.550927
te10	oesophagus	0.121	0.026	11.061	9.7102
te11	oesophagus	0.067	8.838	5.825	12.3249	>30	>30	-0.731668
te14	oesophagus	0.493	73.568	5.664	10.9111	>30	>30	8.94258
te15	oesophagus	0.188	0.001	0.914	5.2098
te4	oesophagus	0.064	0.128	8.578	3.8923
te441t	soft_tissue	0.116	0.042	1.619	1.9617
te5	oesophagus	0.119	0.084	2.808	3.2438
te6	oesophagus	0.079	0.041	26.353	17.5707	>30	>30	-4.36765
te617t	soft_tissue	0.275	0.016	5.289	1.9873	>30	>30	9.39662
te8	oesophagus	0.141	1.248	30.92	13.7374
te9	oesophagus	0.124	1.395	7.267	10.005
ten	endometrium	0.151	0.05	81.152	2.3186
tf1	haematopoietic_and_lymphoid_tissue	0.158	0.017	17.817	2.7617	>30	>30	9.55483
tgbc11tkb	stomach	0.316	0.135	18.296	2.0286
thp1	haematopoietic_and_lymphoid_tissue	0.143	0.011	6.481	1.9627	>30	>30	9.48115
tm31	central_nervous_system	0.115	0.011	4.676	2.8741
toledo	haematopoietic_and_lymphoid_tissue	0.213	0.017	3.01	2.8795
tov112d	ovary	0.07	0.019	24.723	1.9086
tov21g	ovary	0.077	0.024	31.493	1.9728
tt	oesophagus	0.192	12.769	9.238	13.3978
tt	thyroid	0.192	12.769	9.238	13.3978
tt2609c02	thyroid	0.154	0.109	3.915	2.0462	>30	>30	1.25914
tuhr10tkb	kidney	0.147	0.011	19.126	2.1296
tuhr14tkb	kidney	0.107	0.027	56.281	1.9872
tuhr4tkb	kidney	0.164	0.056	93.71	1.9145
tyknu	ovary	0.058	0.009	3.188	2.746	>30	>30	-16.6287
u118mg	central_nervous_system	0.059	0.006	0.242	2.1319	>30	>30	0.323151
u251mg	central_nervous_system	0.076	0.033	2.101	1.8019	>30	>30	5.60328
u266b1	haematopoietic_and_lymphoid_tissue	0.248	0.081	1.718	1.9696	>30	>30	-10.5193
u2os	bone	0.49	0.009	30.56	2.0142
u87mg	central_nervous_system	0.07	0.001	0.343	2.029	>30	>30	8.9199
u937	haematopoietic_and_lymphoid_tissue	0.128	0.031	0.639	1.5494	>30	>30	7.82145
uacc257	skin	0.041	0.001	7.22	2.1215	>30	>30	-7.08846
uacc62	skin	0.097	0.033	17.352	1.4861	>30	>30	6.97644
uacc812	breast	0.134	0.027	260.343	2.0448
uacc893	breast	0.11	0.087	220.825	3.3611
umuc1	urinary_tract	0.75	0.103	6.419	2.1436
umuc3	urinary_tract	0.164	0.009	3.099	3.4447
vcap	prostate	0.74	0.028	4.504	2.6611
vmcub1	urinary_tract	0.647	19.21	15.332	5.5176	>30	>30	-7.05637
vmrcrcw	kidney	0.143	0.043	50.047	1.9934	>30	>30	2.56175
vmrcrcz	kidney	0.093	0.001	75.923	1.7056
wm115	skin	0.066	0.034	3.251	1.9795	>30	>30	3.38142
wm1799	skin	0.084	0.039	4.373	6.2584	>30	>30	6.5883
wm2664	skin	0.335	0.083	2.696	1.9518	>30	>30	-0.242122
wm793	skin	0.019	0.038	2.425	1.8995
wm88	skin	0.015	0.018	18.418	1.5305
wm983b	skin	0.032	0.016	10.087	2.2567	>30	>30	-18.0838
wsudlcl2	haematopoietic_and_lymphoid_tissue	0.002	0.001	1.468	1.8036
yapc	pancreas	0.108	2.852	3.104	3.5946	>30	>30	-2.57883
yd10b	upper_aerodigestive_tract	0.087	0.193	11.059	2.4833
yd15	salivary_gland	0.32	0.11	7.293	2.7771
yd38	upper_aerodigestive_tract	0.061	0.057	2.735	9.5031
yd8	upper_aerodigestive_tract	0.052	0.216	3.543	7.0926
yh13	central_nervous_system	0.035	0.18	1.624	2.0517
ykg1	central_nervous_system	0.087	0.057	1.8	1.3213
yuduty	skin	0.12	0.001	8.935	1.828
zr751	breast	0.308	0.078	216.687	7.0636	>30	>30	-5.97533
zr7530	breast	0.157	0.053	110.881	2.0346
